# Supplementary material
Source: publisher site journal article supplement (http://www.kjim.org/upload/media/kjim-2021-299-suppl4.pdf)
Supplement: Supplementary file 1 [file kjim-2021-299-suppl4.pdf]

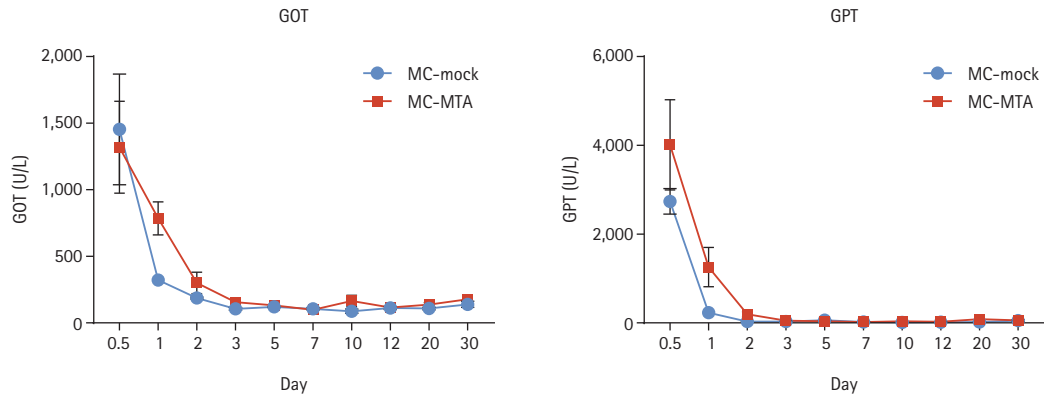

**Supplementary Figure 3.** Liver function. GOT, glutamate oxaloacetate transaminase; GPT, glutamate pyruvate transaminase; MC, mini-circle; MTA, multiple target-directed agent.
